# Supplementary material for: High energy density at high temperature in PLZST antiferroelectric ceramics
Source: Royal Society of Chemistry journal article supplement (doi:10.1039/c9tc00944b), 2019-01-01
Supplement: c9tc00944b1.pdf [file c9tc00944b1.pdf]

## Supplementary Information

### High energy density under high temperature in PLZST antiferroelectric ceramics

Pin Liu<sup>a</sup>, Baoyan Fan<sup>a</sup>, Guang Yang<sup>b,c</sup>, Wenru Li<sup>a</sup>, Haibo Zhang<sup>d\*</sup>, Shenglin Jiang<sup>a,e\*</sup>

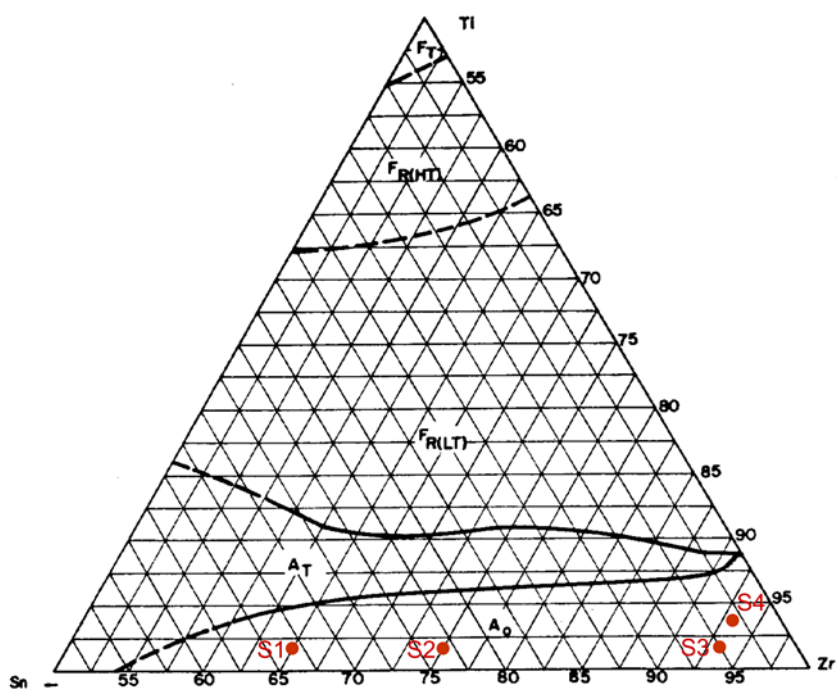

**Fig. S1** PbZrO<sub>3</sub>, PbTiO<sub>3</sub>, PbSnO<sub>3</sub> ternary phase diagram, the selected compositions of AFE ceramics is marked by red dot.

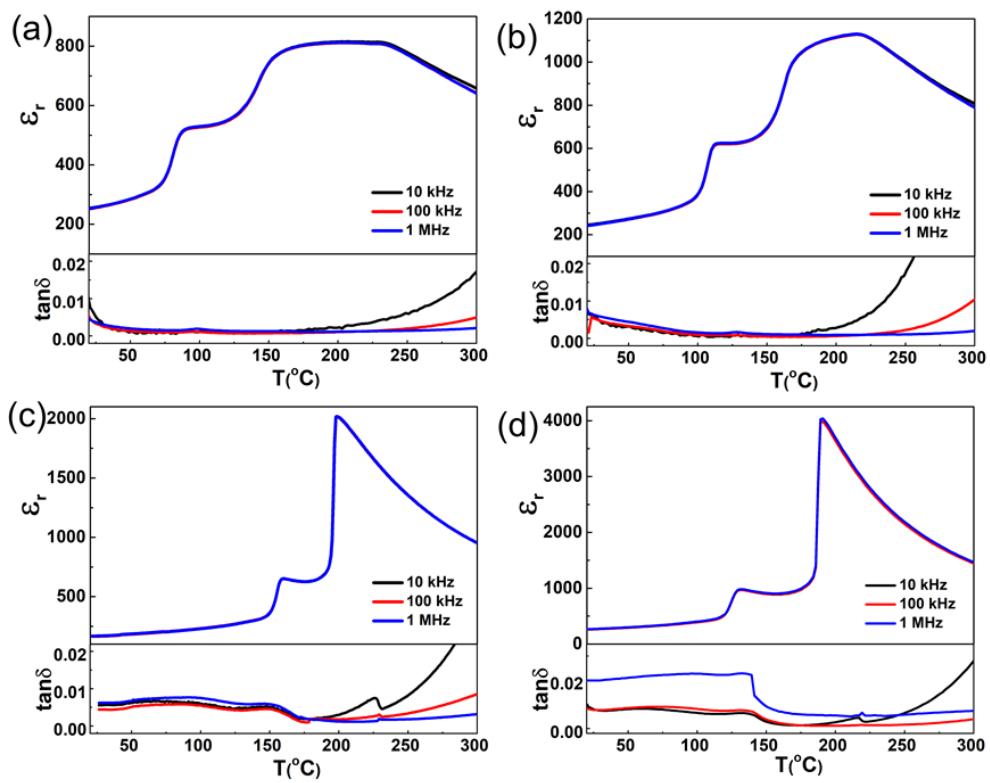

**Fig. S2** The temperature-dependent dielectric properties of S1-S4.

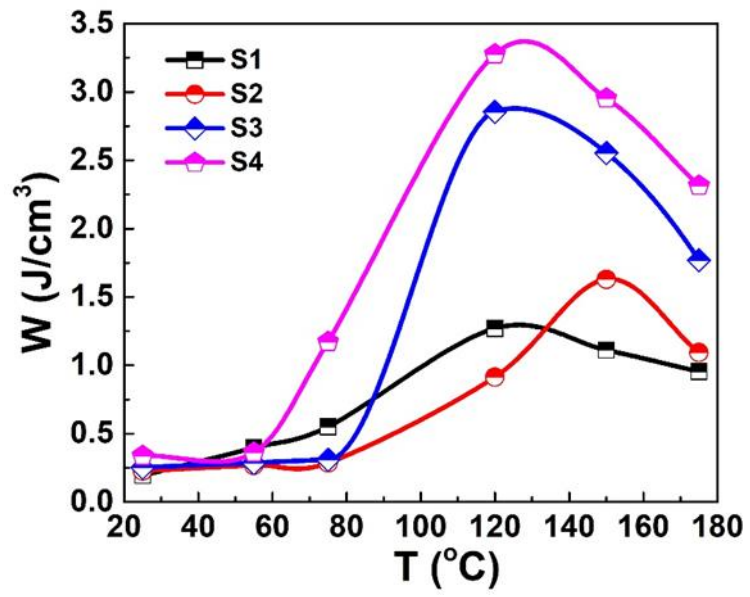

Fig. S3 The recoverable energy storage of S1-S4 under different temperature.

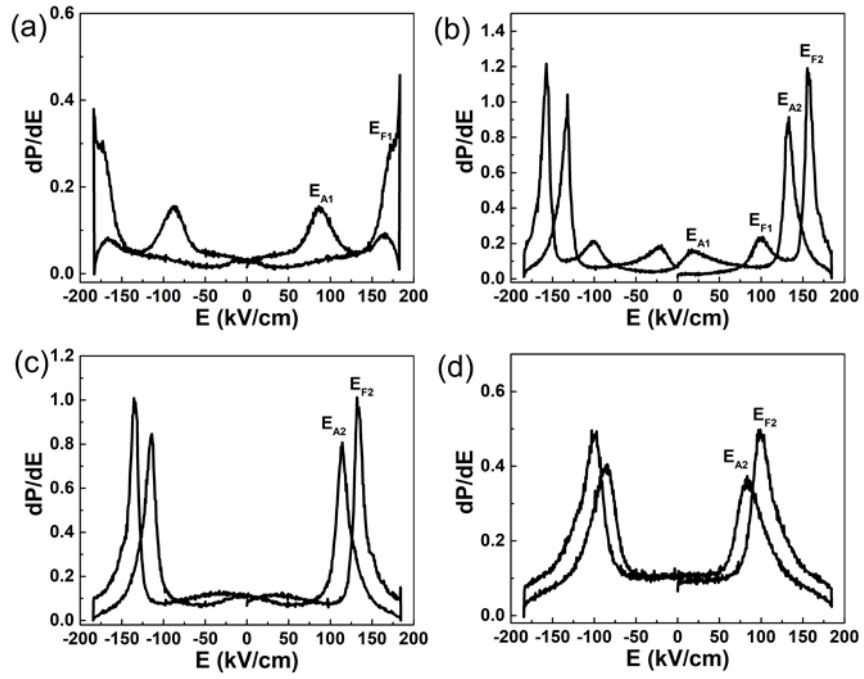

**Fig. S4** The  $dP/dE$ - $E$  loops of S4 at 25 °C, 50 °C, 75 °C, 120 °C, 150 °C, 175 °C.
